# Supplementary material for: Fabrication and characterization of Cu(OH)2/CuO nanowires as a novel sensitivity enhancer of the luminol–H2O2chemiluminescence system: determination of cysteine in human plasma
Source: Royal Society of Chemistry journal article supplement (doi:10.1039/c5ra21085b), 2016-01-01
Supplement: c5ra21085b1.pdf [file c5ra21085b1.pdf]

**Fabrication and Characterization of Cu(OH)<sub>2</sub>/CuO Nanowires as the Novel  
Sensitivity Enhancer of Luminol-H<sub>2</sub>O<sub>2</sub> Chemiluminescence System:  
Determination of Cysteine in Human Plasma**

**A. Mokhtari<sup>\*,a</sup>, A. Goudarzi<sup>b</sup>, M. Benam<sup>a,c</sup>, S. Mehdizadeh Langroodi<sup>a</sup>, S. Karimmohammad<sup>d</sup>  
and Mohsen Keyvanfard<sup>e</sup>**

*<sup>a</sup>. Department of Science, Golestan University, Gorgan, Iran.*

*<sup>b</sup>. Department of Polymer Engineering, Golestan University, Gorgan, Iran.*

*<sup>c</sup>. Faculty of Chemistry, Kharazmi University, Tehran, Iran.*

*<sup>d</sup>. Shahid Sayyad Shirazy Hospital, Gorgan, Iran*

*<sup>e</sup>. Department of Chemistry, Majlesi Branch, Islamic Azad University, Isfahan, Iran*

**RSC Advances**

\* Corresponding author

E-mail address: alimo58@yahoo.com (A. Mokhtari), Tel./Fax: +98-173-2322810;

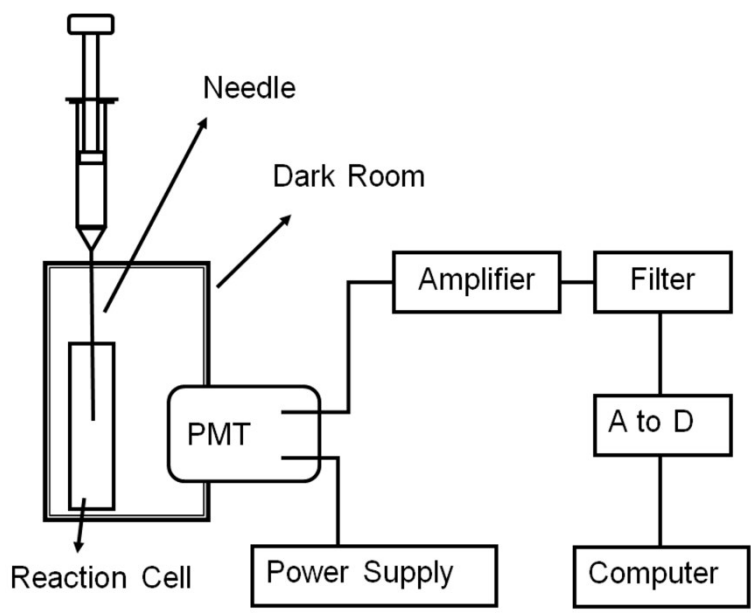

**Fig. S1** Schematic block diagram of the CL instrument. PMT: photomultiplier tube, A to D: analog to digital interface

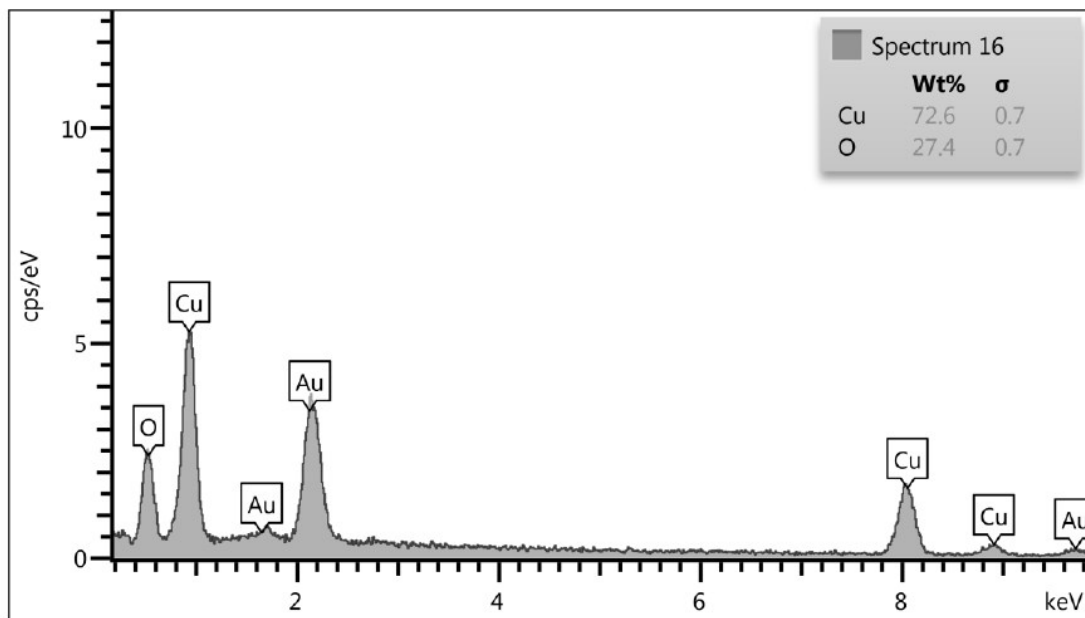

**Fig. S2** EDX spectrum of prepared  $\text{Cu}(\text{OH})_2/\text{CuO}$  nanowires

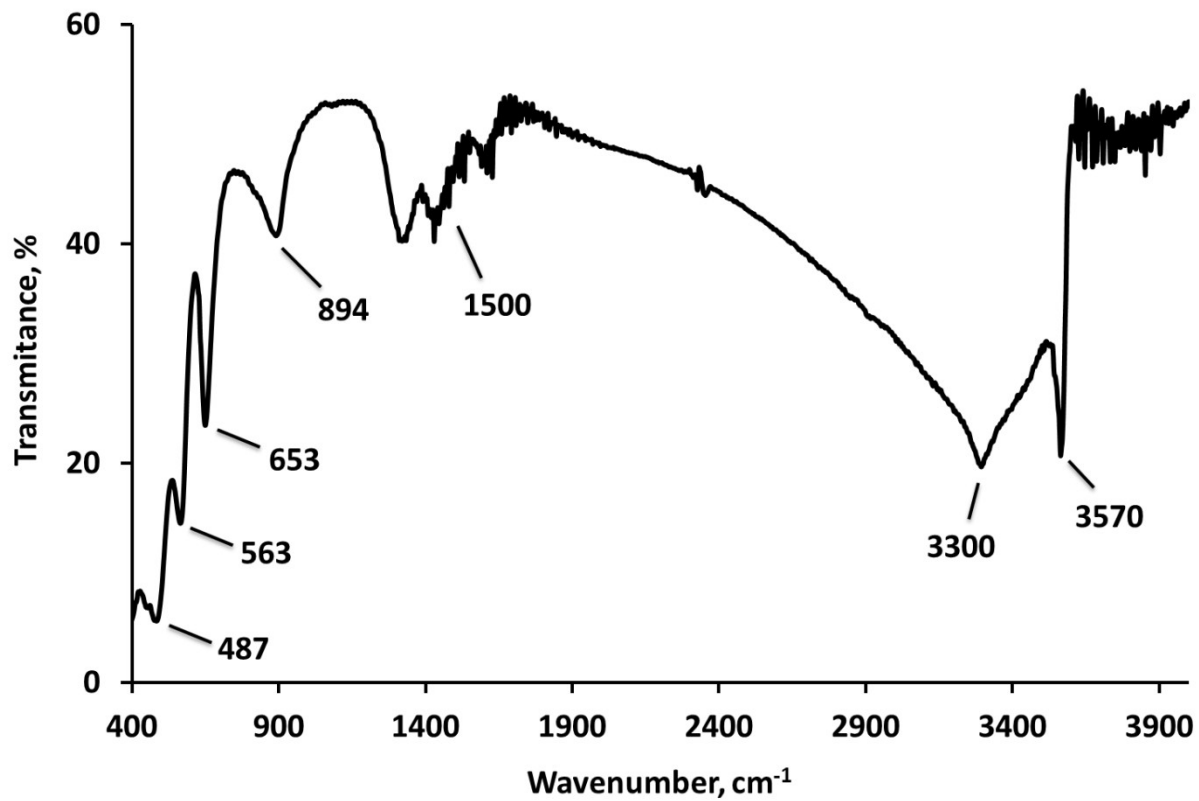

Fig. S3 FT-IR spectrum of the prepared Cu(OH)<sub>2</sub>/CuO NWs.

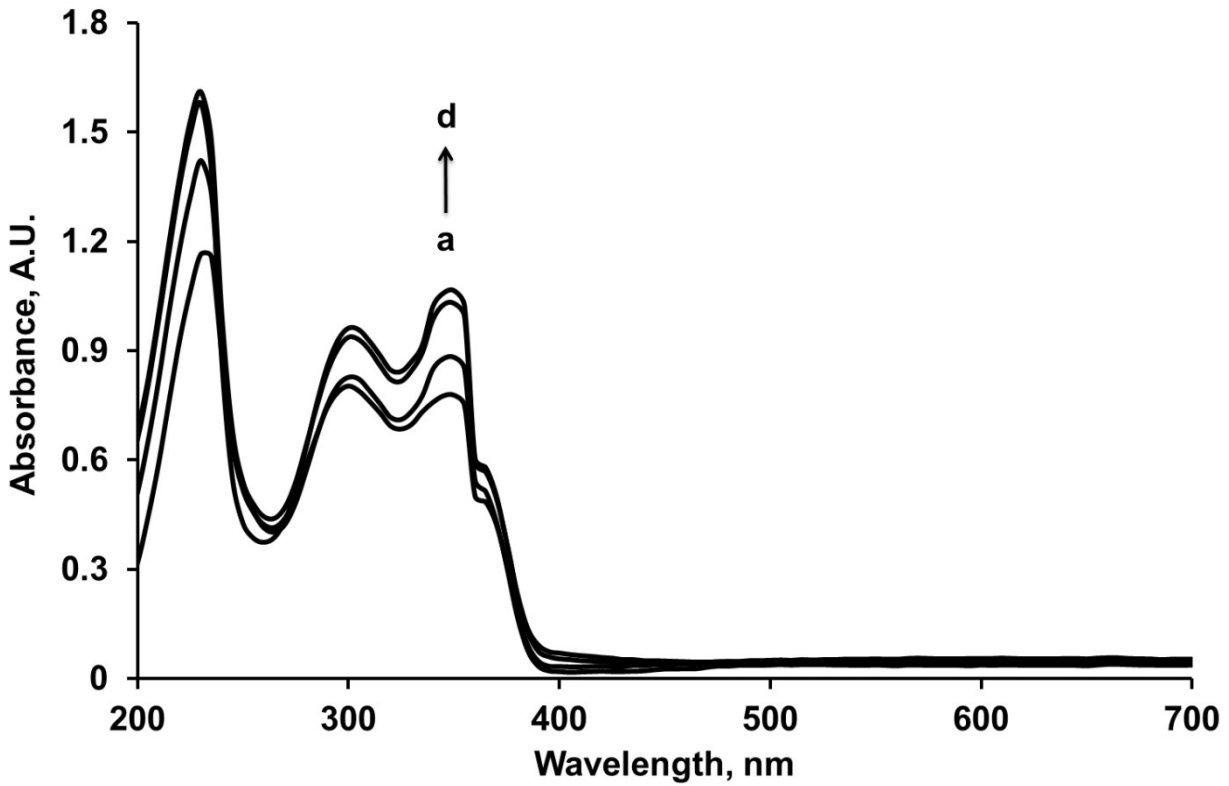

**Fig. S4** UV-Vis spectra of a) luminol-cysteine-H<sub>2</sub>O<sub>2</sub>-Cu(OH)<sub>2</sub>/CuO NWs b) luminol-cysteine-H<sub>2</sub>O<sub>2</sub> c) luminol-H<sub>2</sub>O<sub>2</sub> d) luminol. Conditions: luminol ( $1.25 \times 10^{-4}$  mol L<sup>-1</sup>) in Na<sub>2</sub>CO<sub>3</sub> (0.025 mol L<sup>-1</sup>), H<sub>2</sub>O<sub>2</sub> ( $2.5 \times 10^{-3}$  mol L<sup>-1</sup>), NWs (8.0 mg L<sup>-1</sup>), cysteine ( $2.5 \times 10^{-4}$  mol L<sup>-1</sup>).

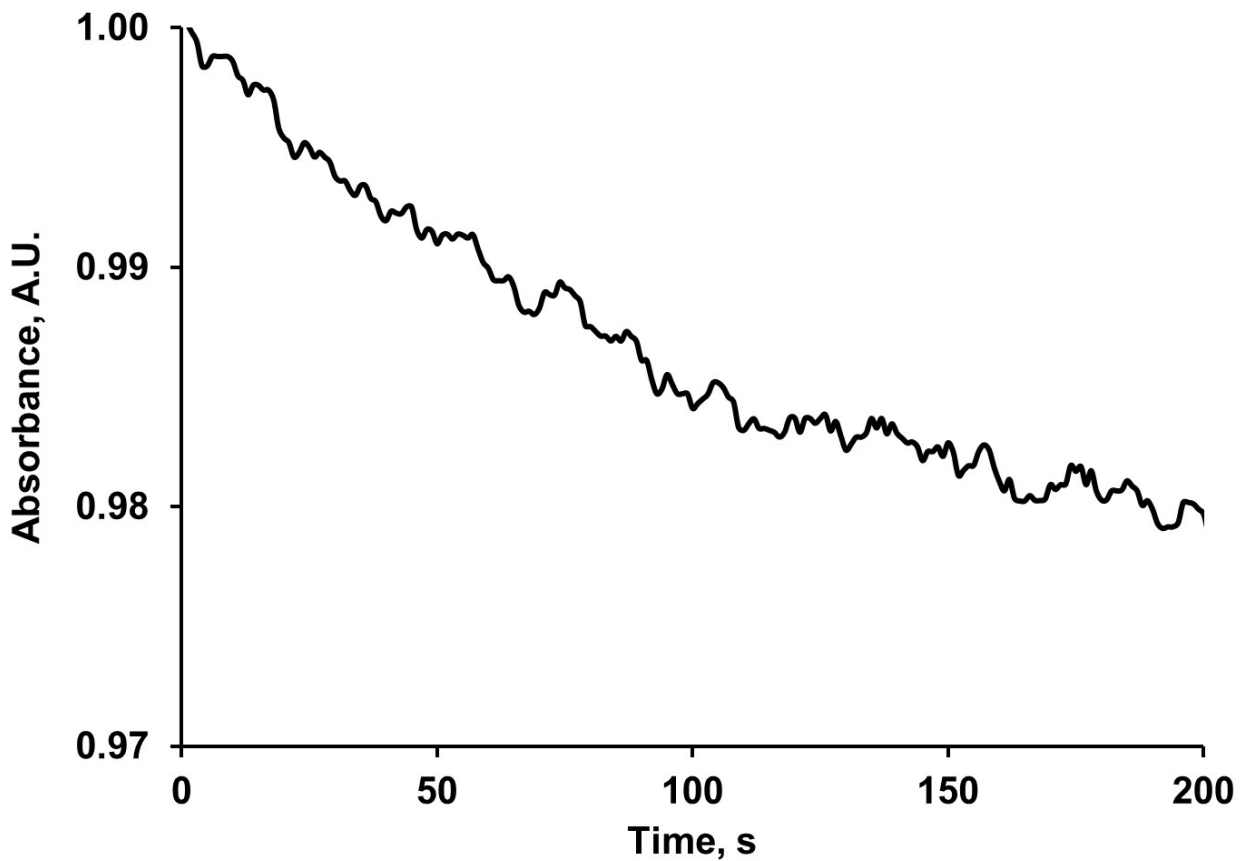

**Fig. S5** Time course curve for luminol ( $1.25 \times 10^{-4} \text{ mol L}^{-1}$ ) in  $\text{Na}_2\text{CO}_3$  ( $0.025 \text{ mol L}^{-1}$ ) at 350 nm in presence of  $\text{Cu}(\text{OH})_2/\text{CuO}$  NWs ( $8.0 \text{ mg L}^{-1}$ ).
